# Supplementary material for: Swallowing outcomes in dysphagia interventions in Parkinson’s disease: a scoping review
Source: HighWire-hosted journal article supplement (doi:10.1136/bmjebm-2022-112082), 2022-11-11
Supplement: bmjebm-2022-112082supp003_data_supplement.pdf [file bmjebm-2022-112082supp003_data_supplement.pdf]

Additional file 3: Data extraction chart

| Complete data extraction |             |                                            |              |                             |                                                          |            |                                                      |                                                             |                                                                                                                                                                                                           |                                                   |                                                                                                                                                                                                                                                                                                                                                                                                                                                                                                                                                                                                                                                                                                                                                                                                                                                                                                                                                   |                 |           |
|--------------------------|-------------|--------------------------------------------|--------------|-----------------------------|----------------------------------------------------------|------------|------------------------------------------------------|-------------------------------------------------------------|-----------------------------------------------------------------------------------------------------------------------------------------------------------------------------------------------------------|---------------------------------------------------|---------------------------------------------------------------------------------------------------------------------------------------------------------------------------------------------------------------------------------------------------------------------------------------------------------------------------------------------------------------------------------------------------------------------------------------------------------------------------------------------------------------------------------------------------------------------------------------------------------------------------------------------------------------------------------------------------------------------------------------------------------------------------------------------------------------------------------------------------------------------------------------------------------------------------------------------------|-----------------|-----------|
| 1st author's name, year  | Country     | Study design                               | N (dropouts) | Intention to treat analysis | Age                                                      | Gender     | PD severity                                          | OD severity                                                 | Intervention                                                                                                                                                                                              | Comparator                                        | Applied outcome measures + way of measurement                                                                                                                                                                                                                                                                                                                                                                                                                                                                                                                                                                                                                                                                                                                                                                                                                                                                                                     | Timepoints      | Frequency |
| Ayres, 2017              | Brazil      | CCT                                        | 32 (8)       | No                          | IG: 62.0 (SD±11.5) CG1: 62.8 (SD±6.2) CG2: 64.5 (SD±5.6) | m=18, f=6  | IG: 2.8 (SD±0.8) CG1: 2.5 (SD±0.7) CG2: 2.5 (SD±0.8) | FOIS: IG: 5.9 (SD ±1.3) CG1: 6.8 (SD±0.5) CG2: 6.8 (SD±0.4) | Chin-down posture maneuver                                                                                                                                                                                | CG1: no intervention CG2: swallowing orientations | > FEES:<br>- prior state of secretion in nasopharyngeal structures, oropharynx, laryngopharynx<br>- presence/absence of: thickening on the posterior laryngeal wall, tremor in structures (BOT, vallecula), early escape, vallecular stasis in glossoepiglottic folds and pyriform sinus, penetration, tracheal aspiration, cough reflex<br>> CSE (presence/absence)<br>- history of aspiration pneumonia<br>- alert state, interaction attention/ability, postural control, fatiguability<br>- awareness of the swallowing problem & of secretion<br>- ability to manipulate flows<br>- anatomy and oral, pharyngeal and laryngeal physiology<br>- orofacial tones & sensitivity<br>- oral apraxia, swallowing apraxia<br>- gag pharyngeal contraction, cough and hawk<br>- saliva swallowing<br>- oral residue<br>- delayed swallowing reflex, multiple swallowing<br>- reduction in laryngeal elevation<br>> wet voice<br>> FOIS<br>> SWAL-QOL | pre, post (4w)  | 2         |
| Baijens, 2012            | Netherlands | Feasibility/pilot study with control group | 20 (N/S)     | No                          | 65.5 (46-81)                                             | m=14, f=6  | median: 2 (1-3)                                      | mild to severe                                              | SES (VitalStim), 3 different electrode positions applied in random order per subject                                                                                                                      | Healthy controls with same intervention           | VFS:<br>- moment of opening and closing of: glossopalatal junction, velopharyngeal junction, laryngeal vestibule, upper esophageal sphincter<br>- PAS<br>- movement patterns of hyoid bone<br>- extent of movement of hyoid bone<br>- pre-swallow anterior spill<br>- preswallow posterior spill<br>- lingualpumping<br>- swallow hesitancy<br>- piecemeal deglutition<br>- delayed initiation of the pharyngeal reflex<br>- postswallow oral oral residue<br>- postswallow vallecular pooling<br>- postswallow pyriform sinus pooling<br>- PAS                                                                                                                                                                                                                                                                                                                                                                                                   | during          | 1         |
| Baijens, 2013            | Netherlands | quasi-RCT                                  | 109 (19)     | No                          | median: 68                                               | m=66, f=24 | median: 2(1-4)                                       | mild to severe                                              | IG1: traditional logopedic dysphagia treatment + SES of submental region; motor-level stimulation;<br>IG2: traditional logopedic dysphagia treatment + SES of submental region; sensory-level stimulation | Traditional logopedic dysphagia treatment         | > FEES:<br>- Preswallow posterior spill<br>- Piecemeal deglutition<br>- Delayed initiation pharyngeal reflex<br>- Postswallow vallecular pooling<br>- Postswallow pyriform sinus pooling<br>- PAS<br>> VFS:<br>- Preswallow anterior spill<br>- Preswallow posterior spill<br>- Lingual pumping<br>- Swallow hesitancy<br>- Piecemeal deglutition<br>- Delayed initiation pharyngeal reflex<br>- Postswallow oral residue<br>- Postswallow vallecular pooling<br>- Postswallow pyriform sinus pooling<br>- PAS                                                                                                                                                                                                                                                                                                                                                                                                                                    | pre, post (15d) | 2         |

|                |               |           |                               |    |                                                                |                                |                                                        |                                                  |                                                                                                                                     |                                                                              |                                                                                                                                                                                                                                                                                                                                                                                                                                                                                                                                                                                                                                                                                                                                                                                                              |                                                 |        |
|----------------|---------------|-----------|-------------------------------|----|----------------------------------------------------------------|--------------------------------|--------------------------------------------------------|--------------------------------------------------|-------------------------------------------------------------------------------------------------------------------------------------|------------------------------------------------------------------------------|--------------------------------------------------------------------------------------------------------------------------------------------------------------------------------------------------------------------------------------------------------------------------------------------------------------------------------------------------------------------------------------------------------------------------------------------------------------------------------------------------------------------------------------------------------------------------------------------------------------------------------------------------------------------------------------------------------------------------------------------------------------------------------------------------------------|-------------------------------------------------|--------|
| Byeon, 2016    | Korea         | RCT       | 33 (N/S)                      | No | IG: 63.8 (SD ± 8.2)<br>CG: 65.1 (SD ± 9.5)                     | m=31, f=2                      | IG: 15 ≤ H&Y 3; 3 > H&Y 4<br>CG: 11 ≤ H&Y 3; 4 > H&Y 4 | N/S                                              | Postural techniques + EMST                                                                                                          | EMST                                                                         | > VFS:<br>- Functional Dysphagia Scale (FDS)                                                                                                                                                                                                                                                                                                                                                                                                                                                                                                                                                                                                                                                                                                                                                                 | pre, post (4w)                                  | 2      |
| Claus, 2021    | Germany       | RCT       | 53 (8)                        | No | IG: 67.3 (54-83; SD ± 9.5)<br>CG: 67.1 (49-82; SD ± 7.7)       | IG: m=19, f=5<br>CG: m=18, f=3 | IG: 2.5 (2-4), CG: 2.6 (2-4)                           | N/S                                              | EMST (calibrated)                                                                                                                   | EMST (sham)                                                                  | > FEES (5-point scales):<br>- premature spillage<br>- penetration-aspiration events<br>- residue<br>- total FEES score (0-108)<br>> SWAL-QOL (German)<br>> Swallowing Disturbance Questionnaire (SDQ) (German)<br>> MES (only 22 patients, sub-group):<br>- frequency bands: theta (4–8 Hz), alpha (8–13 Hz), beta (13–30 Hz), low-gamma, (30–60 Hz), and high-gamma (60–80 Hz)<br>- in all frequency bands: source localization of each subject's swallowing-associated event-related desynchronization (ERD) of cortical rhythms                                                                                                                                                                                                                                                                           | pre, post (4w, 3m)                              | 3      |
| Feng, 2019     | China         | CCT       | 60 (N/S)                      | No | IG: 65.20 (SD ± 6.84) (54-84)<br>CG: 64.66 (SD ± 5.27) (56-75) | m=38, f=22                     | N/S                                                    | >18 on the SSA (inclusion criterium)             | Vocal training + conventional swallowing treatment                                                                                  | Conventional swallowing treatment                                            | > SSA<br>> Evaluation of salivation:<br>- UPDRS II<br>- Drooling Severity and Frequency Scale (DSFS)<br>> Voice evaluation<br>- Maximum phonation time (MPT)<br>- Maximum phonation decibel                                                                                                                                                                                                                                                                                                                                                                                                                                                                                                                                                                                                                  | pre, post (4w)                                  | 2      |
| Heijnen, 2012  | Netherlands   | quasi-RCT | 109 (21)                      | No | Median 68 (42-81)                                              | m=65, f=23                     | Median 2 (1-4)                                         | FOIS: median 7 (1-7)                             | Traditional logopedic dysphagia treatment + NMES (VitalStim) of the supra hyoid musculature: Group 2 (NMES-M); motor level, Group 3 | Group 1: traditional logopedic dysphagia treatment                           | > FOIS<br>> SWAL-QOL (Dutch)<br>> MD Anderson Dysphagia Inventory (MDADI) (Dutch)<br>> Dysphagia Severity Scale (DSS)<br>> FEES                                                                                                                                                                                                                                                                                                                                                                                                                                                                                                                                                                                                                                                                              | pre, post, 3m (DSS post each treatment session) | 3 (15) |
| Khedr, 2019    | Egypt         | RCT       | 33 (3)                        | No | IG: 60.7 (SD ± 8.8)<br>CG: 57.4 (SD ± 10.0)                    | N/S                            | IG: 3.1 (SD ±1.1)<br>CG: 3.5 (SD ±1.0)                 | SDQ:<br>IG: 17.4 (SD ±6.1)<br>CG: 16.2 (SD±5.8)  | Repetitive Transcranial Magnet Stimulation                                                                                          | Sham                                                                         | > H&Y<br>> UPDRS III<br>> Instrumental Activities of Daily Living (IADL)<br>> Self-assessment scale of swallowing<br>> SDO<br>> Arabic DHI<br>> VFS (for 9 in IG, 6 in CG, pre, post)<br>- pharyngeal transit time (PTT)<br>- time of first superior-anterior movemnt of hyoid bone H1<br>- time when hyoid bone reached its max elevation H2<br>- time required for max elevation of the hyoid bone H2-H1<br>- PAS<br>- postswallow residue                                                                                                                                                                                                                                                                                                                                                                 | pre, post (2w, 1m, 2m, 3m)                      | 5      |
| Kondo, 2017    | Japan         | RCT       | 20, thereof 3 with PD (N/S)   | No | IG: 80.4 (SD ±9.5)<br>CG: 80.1 (SD ±5.9)                       | m=19, f=1                      | N/S                                                    | N/S                                              | Aural stimulation with capsaicin ointment                                                                                           | Aural stimulation with placebo ointment                                      | > Endoscopic swallowing scoring:<br>- Salivary pooling in vallecula and pyriform sinuses<br>- The response of glottal closure reflex induced by touching epiglottis with endoscope<br>- The location of the bolus at the time of swallow onset assessed by endoscopic whiteout<br>- The extent of pharyngeal clearance after swallowing of blue-dyed water<br>- Total swallowing function<br>> Sensory-Motor-Reflex-Clearance (SMRC) scale:<br>- Sensory: Initiation of swallowing reflex as assessed by endoscopic whiteout<br>- Motion: holding bolus in oral cavity and inducing laryngeal elevation according to instructions<br>- Reflex: glottal closure and cough reflexes induced by touching epiglottis or arytenoids with endoscope<br>- Clearance: pharyngeal clearance of bolus after swallowing | pre, post (5, 30, 60 min)                       | 4      |
| Logemann, 2008 | United States | RCT       | 742, thereof 360 with PD (31) | No | range: 50-95                                                   | m=498, f=213                   | N/S                                                    | Aspiration of water on VFS (inclusion criterium) | Chin-down posture while consuming thin liquids                                                                                      | No postural adjustment during swallows of nectar and honey-thickened liquids | > VFS:<br>- Aspiration<br>- Preference for different interventions                                                                                                                                                                                                                                                                                                                                                                                                                                                                                                                                                                                                                                                                                                                                           | during                                          | 1      |

A-DHI: Arabic Dysphagia Handicap Index; CCT: Controlled Clinical Trial; CG: Control Group; CSE: Clinical Swallow Evaluation; DBS: Deep Brain Stimulation; DOSS: Dysphagia Outcome and Severity Scale; DSFS: Drooling Severity and Frequency Scale; DSS: Dysphagia Severity Scale; EMG: Electromyography; EMST: Expiratory Muscle Strength Training; FDS: Functional Dysphagia Scale; FEES: Fiberoptic Endoscopic Evaluation of Swallowing; f: female; FOG: Freezing of Gait; FOIS: Functional Oral Intake Scale; H&Y: Hoehn&Yahr; IADL: Instrumental Activities of Daily Living; IG: Intervention group; m: male; MDADI: MD Anderson Dysphagia Inventory; NMES: Neuromuscular Electrical Stimulation; N/S: not specified; OD: Oropharyngeal Dysphagia; PAS: Penetration-Aspiration-Scale; PD: Parkinson's Disease; POE: Pleasure of Eating; rTMS: repetitive Transcranial Magnetic Stimulation; SDQ: Swallowing Disturbance Questionnaire; SES: Surface Electrical Stimulation; SSA: Standardized Swallowing Assessment; SWAL-CARE: Swallowing Quality of Care Questionnaire; SWAL-QOL: Swallowing Quality of Life Questionnaire; QoL: Quality of Life; RCT: Randomized Controlled Trial; UPDRS: Unified Parkinson's Disease Rating Scale; VDS: Videofluoroscopic Dysphagia Scale; VFS: Videofluoroscopy of Swallowing; V1 / V2: Visit 1 / Visit 2
