# Supplementary material for: Swallowing outcomes in dysphagia interventions in Parkinson’s disease: a scoping review
Source: HighWire-hosted journal article supplement (doi:10.1136/bmjebm-2022-112082), 2022-11-11
Supplement: bmjebm-2022-112082supp004_data_supplement.pdf [file bmjebm-2022-112082supp004_data_supplement.pdf]

## Additional file 4: Excluded outcomes

| #  | Author, Year | Verbatim                                                                          | Definition                                                                                                                                       | Measurement | Timepoints     | Frequency | Reason for exclusion                                           |
|----|--------------|-----------------------------------------------------------------------------------|--------------------------------------------------------------------------------------------------------------------------------------------------|-------------|----------------|-----------|----------------------------------------------------------------|
| 1  | Ayres, 2017  | Prior state of secretion in nasopharyngeal structures, oropharynx, laryngopharynx | N/S                                                                                                                                              | FEES        | pre, post (4w) | 2         | Observations that were made, but not measured and not reported |
| 2  | Ayres, 2017  | Thickening on the posterior laryngeal wall                                        | Presence/absence of thickening on the posterior laryngeal wall                                                                                   | FEES        | pre, post (4w) | 2         | Observations that were made, but not measured and not reported |
| 3  | Ayres, 2017  | Tremor in structures (BOT, vallecula)                                             | Presence/absence of tremor in structures (BOT, valleculae)                                                                                       | FEES        | pre, post (4w) | 2         | Observations that were made, but not measured and not reported |
| 4  | Ayres, 2017  | Early escape                                                                      | Characterized by the presence of food in the hypopharynx or larynx before the swallowing reflex was triggered                                    | FEES        | pre, post (4w) | 2         | Observations that were made, but not measured and not reported |
| 5  | Ayres, 2017  | Vallecular stasis in glossoepiglottic folds and pyriform sinus                    | Characterized by accumulation of food after the third swallowing on the mentioned structures                                                     | FEES        | pre, post (4w) | 2         | Observations that were made, but not measured and not reported |
| 6  | Ayres, 2017  | Penetration                                                                       | Characterized by the presence of food in the laryngeal vestibule                                                                                 | FEES        | pre, post (4w) | 2         | Observations that were made, but not measured and not reported |
| 7  | Ayres, 2017  | Tracheal aspiration                                                               | Characterized by food intake in the region located below the vocal folds, in the subglottic region and in the trachea, at any time of swallowing | FEES        | pre, post (4w) | 2         | Observations that were made, but not measured and not reported |
| 8  | Ayres, 2017  | Cough reflex                                                                      | Presence/absence                                                                                                                                 | FEES        | pre, post (4w) | 2         | Observations that were made, but not measured and not reported |
| 9  | Ayres, 2017  | Ability to manipulate flows                                                       | Presence/absence                                                                                                                                 | CSE         | pre, post (4w) | 2         | Observations that were made, but not measured and not reported |
| 10 | Ayres, 2017  | Postural control                                                                  | Presence/absence                                                                                                                                 | CSE         | pre, post (4w) | 2         | Observations that were made, but not measured and not reported |
| 11 | Ayres, 2017  | Fatiguability                                                                     | Presence/absence                                                                                                                                 | CSE         | pre, post (4w) | 2         | Observations that were made, but not measured and not reported |
| 12 | Ayres, 2017  | Anatomy and oral, pharyngeal and laryngeal physiology                             | Presence/absence                                                                                                                                 | CSE         | pre, post (4w) | 2         | Observations that were made, but not measured and not reported |
| 13 | Ayres, 2017  | Orofacial tones                                                                   | Presence/absence                                                                                                                                 | CSE         | pre, post (4w) | 2         | Observations that were made, but not measured and not reported |
| 14 | Ayres, 2017  | Oral apraxia                                                                      | Presence/absence                                                                                                                                 | CSE         | pre, post (4w) | 2         | Observations that were made, but not measured and not reported |
| 15 | Ayres, 2017  | Orofacial sensitivity                                                             | Presence/absence                                                                                                                                 | CSE         | pre, post (4w) | 2         | Observations that were made, but not measured and not reported |
| 16 | Ayres, 2017  | Gag pharyngeal contraction                                                        | Presence/absence                                                                                                                                 | CSE         | pre, post (4w) | 2         | Observations that were made, but not measured and not reported |

|    |             |                                     |                           |      |                |   |                                                                |
|----|-------------|-------------------------------------|---------------------------|------|----------------|---|----------------------------------------------------------------|
| 17 | Ayres, 2017 | Saliva swallowing                   | Presence/absence          | CSE  | pre, post (4w) | 2 | Observations that were made, but not measured and not reported |
| 18 | Ayres, 2017 | Cough and hawk                      | Presence/absence          | CSE  | pre, post (4w) | 2 | Observations that were made, but not measured and not reported |
| 19 | Ayres, 2017 | Swallowing apraxia                  | Presence/absence          | CSE  | pre, post (4w) | 2 | Observations that were made, but not measured and not reported |
| 20 | Ayres, 2017 | Oral residue                        | Presence/absence          | CSE  | pre, post (4w) | 2 | Observations that were made, but not measured and not reported |
| 21 | Ayres, 2017 | Delayed swallowing reflex           | Presence/absence          | CSE  | pre, post (4w) | 2 | Observations that were made, but not measured and not reported |
| 22 | Ayres, 2017 | Reduction in laryngeal elevation    | Presence/absence          | CSE  | pre, post (4w) | 2 | Observations that were made, but not measured and not reported |
| 23 | Ayres, 2017 | Wet voice                           | Presence/absence          | CSE  | pre, post (4w) | 2 | Observations that were made, but not measured and not reported |
| 24 | Ayres, 2017 | Multiple swallowing                 | Presence/absence          | CSE  | pre, post (4w) | 2 | Observations that were made, but not measured and not reported |
| 25 | Ayres, 2017 | History of aspiration pneumonia     | Presence/absence          | CSE  | pre, post (4w) | 2 | Observations that were made, but not measured and not reported |
| 26 | Ayres, 2017 | Intake of food                      | Level of oral food intake | FOIS | pre, post (4w) | 2 | Observations that were made, but not measured and not reported |
| 27 | Ayres, 2017 | Interaction attention/ability       | Presence/absence          | CSE  | pre, post (4w) | 2 | Observations that were made, but not measured and not reported |
| 28 | Ayres, 2017 | Alert state                         | presence/absence          | CSE  | pre, post (4w) | 2 | Observations that were made, but not measured and not reported |
| 29 | Ayres, 2017 | Awareness of the swallowing problem | Presence/absence          | CSE  | pre, post (4w) | 2 | Observations that were made, but not measured and not reported |
| 30 | Ayres, 2017 | Awareness of secretion              | presence/absence          | CSE  | pre, post (4w) | 2 | Observations that were made, but not measured and not reported |
| 31 | Feng, 2019  | Consciousness                       | N/S                       | SSA  | pre, post (4w) | 2 | Observations that were made for overall SSA score              |
| 32 | Feng, 2019  | Head and trunk control              | N/S                       | SSA  | pre, post (4w) | 2 | Observations that were made for overall SSA score              |
| 33 | Feng, 2019  | Lip closure                         | N/S                       | SSA  | pre, post (4w) | 2 | Observations that were made for overall SSA score              |
| 34 | Feng, 2019  | Voice strength                      | N/S                       | SSA  | pre, post (4w) | 2 | Observations that were made for overall SSA score              |
| 35 | Feng, 2019  | Gag reflex                          | N/S                       | SSA  | pre, post (4w) | 2 | Observations that were made for overall SSA score              |

|    |                   |                                     |                                                                            |                       |                    |     |                                                                                                              |
|----|-------------------|-------------------------------------|----------------------------------------------------------------------------|-----------------------|--------------------|-----|--------------------------------------------------------------------------------------------------------------|
| 36 | Feng, 2019        | Laryngeal movement                  | Presence/absence by observation of the patient drinking (scale from 18-46) | SSA                   | pre, post (4w)     | 2   | Observations that were made for overall SSA score                                                            |
| 37 | Feng, 2019        | Repetitive swallowing               | Presence/absence by observation of the patient drinking (scale from 18-46) | SSA                   | pre, post (4w)     | 2   | Observations that were made for overall SSA score                                                            |
| 38 | Feng, 2019        | Laryngeal function after swallowing | Presence/absence by observation of the patient drinking (scale from 18-46) | SSA                   | pre, post (4w)     | 2   | Observations that were made for overall SSA score                                                            |
| 39 | Feng, 2019        | Time required to swallow            | Presence/absence by observation of the patient drinking (scale from 18-46) | SSA                   | pre, post (4w)     | 2   | Observations that were made for overall SSA score                                                            |
| 40 | Feng, 2019        | Breathing                           | clinical examination (scale from 18-46)                                    | SSA                   | pre, post (4w)     | 2   | Observations that were made for overall SSA score                                                            |
| 41 | Feng, 2019        | Wheezing during swallowing          | presence/absence by observation of the patient drinking (scale from 18-46) | SSA                   | pre, post (4w)     | 2   | Observations that were made for overall SSA score                                                            |
| 42 | Heijnen, 2012     | N/S                                 | N/S                                                                        | FEES                  | N/S                | N/S | No specification of outcomes being measured                                                                  |
| 43 | Heijnen, 2012     | N/S                                 | N/S                                                                        | VFS                   | N/S                | N/S | No specification of outcomes being measured                                                                  |
| 44 | Khedr, 2019       | Diagnosis of dysphagia              | - N/S (a score on the SDQ of $\geq 11$ indicates dysphagia.)               | SDQ                   | pre                | 1   | Is reported as an outcome but was only conducted for assessing dysphagia pre treatment for inclusion         |
| 45 | Silva-Arone, 2021 | N/S                                 | N/S                                                                        | VFS: Eisenhuber scale | pre, post (3m, 6m) | 3   | No specification, outcome was only reported in unpublished Master thesis, referenced by Battel et al. (2020) |
| 46 | Wei, 2017         | Mis-inhalation                      | N/S                                                                        | N/S                   | post (6m)          | 1   | No definition of the outcome, unclear to what this relates and what was measured                             |

CSE: Clinical Swallow Evaluation; FEES: Fiberoptic Evaluation of Swallowing; N/S: not specified; SDQ: Swallowing Disturbance Questionnaire; SSA: Standardized Swallow Assessment; VFS: Videofluoroscopy of Swallowing; w: weeks
