# Supplementary material for: Swallowing outcomes in dysphagia interventions in Parkinson’s disease: a scoping review
Source: HighWire-hosted journal article supplement (doi:10.1136/bmjebm-2022-112082), 2022-11-11
Supplement: bmjebm-2022-112082supp007_data_supplement.pdf [file bmjebm-2022-112082supp007_data_supplement.pdf]

## Additional file 7: Timepoints and frequency of measurement

| Outcome                                       | Timepoints of measurement                                                                                                                      | Frequency of measurement |
|-----------------------------------------------|------------------------------------------------------------------------------------------------------------------------------------------------|--------------------------|
| Death                                         | continuously during 3m                                                                                                                         | continuously             |
| Oropharyngeal dysphagia severity              | pre, post (5min, 30min, 60min, 2w, 1m, 3m, 6m)                                                                                                 | 1 to 3                   |
| Drooling                                      | pre, post (4w)                                                                                                                                 | 2                        |
| Salivary pooling                              | pre, post (5min, 30min, 60min)                                                                                                                 | 4                        |
| Orolingual bolus control                      | during, pre, post (5min, 30min, 60min, 15d, 1m, 3m)                                                                                            | 1 to 4                   |
| Oral bolus transport                          | during, pre, post (15d)                                                                                                                        | 1 to 2                   |
| Swallowing related lingual movement           | pre, post (15d)                                                                                                                                | 2                        |
| Timing of oropharyngeal swallow components    | during, pre, post (0min, 2w, 4w)                                                                                                               | 1 to 2                   |
| Laryngeal elevation                           | pre, post (5min, 30min, 60min)                                                                                                                 | 4                        |
| Laryngeal sensation                           | pre, post (5min, 30min, 60min)                                                                                                                 | 4                        |
| Swallowing related hyoid bone movement        | during, pre, post (4w)                                                                                                                         | 1 to 2                   |
| Initiation of pharyngeal swallow              | during, pre, post (0d, 5min, 30min, 60min, 15d, 2w)                                                                                            | 1 to 4                   |
| Postswallow oral residue                      | during, pre, post (15d)                                                                                                                        | 1 to 2                   |
| Postswallow pharyngeal residue                | pre, post (5min, 30min, 60min, 2w, 1m, 3m)                                                                                                     | 2 to 4                   |
| Postswallow pharyngeal pooling                | during, pre, post (15d)                                                                                                                        | 1 to 2                   |
| Piecemeal deglutition                         | during, pre, post (15d)                                                                                                                        | 1 to 2                   |
| Penetration/Aspiration                        | during, pre, post (0min, 15d, 2w, 1m, 3m)<br>V1: during; V2 (at least 6m later): during                                                        | 1 to 2                   |
| Cortical reorganization                       | pre, post (1m)                                                                                                                                 | 2                        |
| Motor evoked potential (MEP)                  | pre, post (0min, 30min)                                                                                                                        | 3                        |
| Overall motor symptoms                        | pre, post (2w, 1m, 2m, 3m)<br>V1: during; V2 (at least 6m later): during                                                                       | 2 to 5                   |
| Tremor                                        | V1: during; V2 (at least 6m later): during                                                                                                     | 2                        |
| Rigidity                                      | V1: during; V2 (at least 6m later): during                                                                                                     | 2                        |
| Bradykinesia                                  | V1: during; V2 (at least 6m later): during                                                                                                     | 2                        |
| Axial symptoms                                | V1: during; V2 (at least 6m later): during                                                                                                     | 2                        |
| Freezing of gait                              | V1: during; V2 (at least 6m later): during                                                                                                     | 2                        |
| Phonation                                     | pre, post (4w)                                                                                                                                 | 2                        |
| Loudness                                      | pre, post (4w)                                                                                                                                 | 2                        |
| Level of oral intake                          | pre, post (3m, 6m)                                                                                                                             | 3                        |
| Aspiration pneumonia                          | continuously during 3m                                                                                                                         | continuously             |
| Activities of daily living                    | pre, post (2w, 1m, 2m, 3m)                                                                                                                     | 5                        |
| Pleasure of oral intake                       | pre, post (2w, 4w)                                                                                                                             | 3                        |
| Swallowing related quality of life            | pre, post (1m, 3m, 6m)                                                                                                                         | 2 to 3                   |
| Self-perception of swallowing                 | pre, post (2w, 1m, 2m, 3m, 6m)<br>2 x pre, after each session (13-15), 2 x post<br>V1: post (30 min);<br>V2 (at least 6m later): post (30min)" | 2 to 15                  |
| Self-perception of walking                    | V1: during; V2 (at least 6m later): during                                                                                                     | 2                        |
| Self-perception of activities of daily living | pre, post (2w, 1m, 2m, 3m)                                                                                                                     | 5                        |
| Patient's satisfaction with intervention      | during, post (2w)                                                                                                                              | 1                        |
| Patient's adherence to intervention           | weekly                                                                                                                                         | 36                       |
| Hospitalization                               | continuously during 3m                                                                                                                         | continuously             |
| Adverse events                                | continuously during 3m                                                                                                                         | continuously             |

min: minutes; d: days; w: weeks; m: months; V1: visit 1; V2: visit 2
